# Supplementary material
Source: publisher figshare collection journal article supplement (https://sage.figshare.com/ndownloader/files/13748576)
Supplement: Supplementary file 1 [file 13748576]

**\*\*\* ONLINE SUPPLEMENT SAMPLE OF 193 YOUTH \*\*\***

**Statistical Analysis Strategy**

As with the main sample of 141 youth, in the online supplement sample of 193 youth we first explored the relations between primary study variables and covariates using bivariate correlation analyses (see Table S1). Next, to test hypotheses, we conducted three multiple regression analyses: (1) *NR3C1* expression as the outcome variable, (2) PA as the outcome variable, and (3) NA as the outcome variable. We tested the interaction between perceived responsiveness and self-disclosure and the interaction between perceived responsiveness and gender in separate models. We also tested the two interactions in a combined model and results remained the same (see Tables S2-S4). For the sake of parsimony, we discuss the interactions from the separate models below.

In the analyses for self-disclosure, the predictor variables were standardized scores on self-disclosure, standardized scores on perceived responsiveness, and the interaction between self-disclosure and perceived responsiveness. In the analyses for gender, the predictor variables were dummy-coded gender (0 = male, 1 = female), standardized scores on perceived responsiveness, and the interaction between gender and perceived responsiveness. We tested models with covariates that correlated with the outcome variable at a significance level of  $p < .10$ . For *NR3C1* expression, the significant covariates were ethnicity and anxiety symptoms. For PA, the significant covariates were age, depressive symptoms, and family conflict. For NA, the significant covariates were depressive symptoms and family conflict.

**Results**

***NR3C1* Expression**

**Interaction of perceived responsiveness and self-disclosure.** In line with hypotheses, a significant interaction between perceived responsiveness and self-disclosure emerged for youths' expression of *NR3C1* (see Table S2). As seen in Figure S1A, for youths who perceived their

interaction partners as highly responsive, greater self-disclosure was linked with higher *NR3C1* expression ( $\beta = .38, t(187) = 2.08, p = .04, 95\% \text{ CI } [0.02, .74]$ ). Youths who perceived lower perceived responsiveness had lower *NR3C1* expression for higher levels of self-disclosure ( $\beta = -0.74, t(187) = -2.88, p = .004, 95\% \text{ CI } [-1.25, -.24]$ ). This interaction remained robust in the combined model.

**Interaction of perceived responsiveness and gender.** A significant interaction between perceived responsiveness and gender also emerged for youths' expression of *NR3C1* (see Table S2). As seen in Figure S1B, for youths who perceived their interaction partners as highly responsive *NR3C1* expression was higher in females relative to males ( $\beta = 1.49, t(187) = 3.85, p < .001, 95\% \text{ CI } [0.72, 2.25]$ ). Youths who perceived their interaction partners as less responsive, showed same levels of *R3C1* expression regardless of gender ( $\beta = -0.43, t(187) = -1.02, p = .31, 95\% \text{ CI } [-1.27, 0.40]$ ). This interaction did not reach conventional levels of significance in the combined model ( $\beta = .53, t(185) = 1.71, p = .09, 95\% \text{ CI } [-0.08, 1.15]$ ).

### Positive Affect

**Interaction of perceived responsiveness and self-disclosure.** An interaction between perceived responsiveness and self-disclosure emerged for youths' PA (see Table S3). As seen in Figure S2, for youths who perceived high levels of responsiveness, greater self-disclosure was linked with higher PA ( $\beta = 0.11, t(187) = 2.38, p = .02, 95\% \text{ CI } [0.02, 0.21]$ ). For youths who perceived their interaction partners as less responsive, PA did not significantly differ as a function of self-disclosure ( $\beta = -0.12, t(187) = -1.76, p = .08, 95\% \text{ CI } [-0.26, 0.02]$ ). This interaction remained robust in the combined model.

**Interaction of perceived responsiveness and gender.** As seen in Table S3, the interaction between perceived responsiveness and gender for youths' PA was not significant in the individual

gender model. The same results were observed in the combined model so we do not decompose this interaction further.

### **Negative Affect**

**Interaction of perceived responsiveness and self-disclosure.** An interaction between perceived responsiveness and self-disclosure emerged for youths' NA (see Table S4). As seen in Figure S2, for youths who perceived their interaction partners as highly responsive, greater self-disclosure was not significantly linked with NA ( $\beta = 0.02$ ,  $t(187) = .64$ ,  $p = .52$ , 95% CI [-0.03, 0.07]). For youths who perceived their interaction partners as less responsive, higher levels of self-disclosure were associated with higher NA ( $\beta = 0.11$ ,  $t(187) = 2.92$ ,  $p = .004$ , 95% CI [0.03, 0.18]). This interaction remained robust in the combined model.

**Interaction of perceived responsiveness and gender.** Finally, as seen in Table S4, the interaction between perceived responsiveness and gender for youths' NA was non-significant. This interaction was also non-significant in the combined model.

# Disclosure, Responsiveness, and Gene Expression: Supplement

Table S1

## *Correlations among Study Variables*

| Variable                           | 1      | 2      | 3     | 4      | 5     | 6    | 7     | 8      | 9    | 10     | 11   | 12    | 13   | 14 |
|------------------------------------|--------|--------|-------|--------|-------|------|-------|--------|------|--------|------|-------|------|----|
| 1 NR3C1 Expression                 | -      |        |       |        |       |      |       |        |      |        |      |       |      |    |
| 2 Positive Affect                  | .17*   | -      |       |        |       |      |       |        |      |        |      |       |      |    |
| 3 Negative Affect                  | -.08   | -.32** | -     |        |       |      |       |        |      |        |      |       |      |    |
| 4 Perceived Responsiveness         | .05    | .39**  | -.02  | -      |       |      |       |        |      |        |      |       |      |    |
| 5 Self-Disclosure                  | .06    | .22**  | .16*  | .61**  | -     |      |       |        |      |        |      |       |      |    |
| 6 Gender <sup>a</sup>              | .15*   | .01    | .07   | .17*   | .25** | -    |       |        |      |        |      |       |      |    |
| 7 Age                              | -.04   | -.24** | .11   | .15*   | .18*  | .18  | -     |        |      |        |      |       |      |    |
| 8 Ethnicity <sup>b</sup>           | -.14*  | .04    | -.02  | -.12   | -.15* | -.01 | -.17* | -      |      |        |      |       |      |    |
| 9 Medication Use <sup>c</sup>      | .09    | .02    | -.01  | .03    | .12   | .05  | .03   | -.26** | -    |        |      |       |      |    |
| 10 Asthma Severity Diagnosis       | -.08   | .02    | .11   | .11    | .08   | .15* | .17*  | -.04   | .12  | -      |      |       |      |    |
| 11 Parental Education <sup>d</sup> | .01    | -.08   | .02   | .06    | .02   | -.11 | -.11  | -.19** | -.01 | -.19** | -    |       |      |    |
| 12 Anxiety Symptoms                | -.19** | -.02   | .12   | -.06   | .04   | .04  | .04   | .03    | -.06 | .18*   | .01  | -     |      |    |
| 13 Depressive Symptoms             | -.01   | -.32** | .48** | -.11   | .16*  | .18* | .04   | .02    | -.04 | .09    | -.06 | .19** | -    |    |
| 14 Family Conflict                 | -.08   | -.18*  | .26** | -.19** | -.13  | .05  | .17*  | .09    | .05  | -.13   | -.05 | .04   | .16* | -  |

Note. N = 193 youth. Continuous scores were calculated such that higher scores indicate greater standing on the variable (e.g., greater perceived responsiveness).

<sup>a</sup>0 = male, 1 = female; <sup>b</sup>0 = White, 1 = non-White; <sup>c</sup>0 = no, 1 = yes; <sup>d</sup>0 = high school or less, 1 = some college or more.

+*p* < .10, \**p* < .05, \*\**p* < .01

Table S2

*Associations of the Interaction of Perceived Responsiveness and Self-Disclosure and the Interaction of Perceived Responsiveness and Gender with Glucocorticoid Receptor Gene NR3C1 Expression*

| Variable                            | <u>NR3C1 Expression</u> |      |                |
|-------------------------------------|-------------------------|------|----------------|
|                                     | Coeff                   | SE   | 95% CI         |
| <b><u>Self-Disclosure Model</u></b> |                         |      |                |
| Perceived Responsiveness            | 0.49*                   | 0.32 | [0.08, 0.89]   |
| Self-Disclosure                     | -0.18                   | 0.18 | [-0.54, 0.18]  |
| Responsiveness × Disclosure         | 0.56***                 | 0.13 | [0.30, 0.81]   |
| Ethnicity                           | -0.61                   | 0.34 | [-1.28, 0.06]  |
| Anxiety Symptoms                    | -0.38**                 | 0.13 | [-0.64, -0.11] |
| <b><u>Gender Model</u></b>          |                         |      |                |
| Perceived Responsiveness            | -0.30                   | 0.17 | [-0.63, 0.03]  |
| Gender                              | 0.53                    | 0.28 | [-0.02, 1.07]  |
| Responsiveness × Gender             | 0.96**                  | 0.29 | [0.37, 1.54]   |
| Ethnicity                           | -0.61                   | 0.34 | [-1.13, 0.23]  |
| Anxiety Symptoms                    | -0.43**                 | 0.14 | [-0.70, -0.16] |
| <b><u>Combined Model</u></b>        |                         |      |                |
| Perceived Responsiveness            | 0.25                    | 0.25 | [-0.23, 0.74]  |
| Self-Disclosure                     | -0.23                   | 0.18 | [-0.59, 0.13]  |
| Gender                              | 0.62*                   | 0.27 | [0.08, 1.16]   |
| Responsiveness × Disclosure         | 0.49***                 | 0.14 | [0.22, 0.76]   |
| Responsiveness × Gender             | 0.53                    | 0.31 | [-0.08, 1.15]  |
| Ethnicity                           | -0.60                   | 0.33 | [-1.26, 0.06]  |
| Anxiety Symptoms                    | -0.42**                 | 0.13 | [-0.68, -0.16] |

*Note.*  $N = 193$  youth. Coeff = coefficient;  $SE$  = standard error;  $CI$  = confidence interval. Continuous scores were calculated such that higher scores indicate greater standing on the variable (e.g., greater perceived responsiveness). Continuous predictors and covariates were standardized. Ethnicity (0 = White, 1 = non-White) and gender (0 = male, 1 = female) were dummy-coded.

\* $p < .05$ , \*\* $p < .01$ , \*\*\* $p < .001$

Table S3

*Associations of the Interaction of Perceived Responsiveness and Self-Disclosure and the Interaction of Perceived Responsiveness and Gender with Positive Affect*

| Variable                            | Coeff    | SE   | 95% CI         |
|-------------------------------------|----------|------|----------------|
| <b><u>Self-Disclosure Model</u></b> |          |      |                |
| Perceived Responsiveness            | 0.31***  | 0.06 | [0.20, 0.42]   |
| Self-Disclosure                     | -0.005   | 0.05 | [-0.11, 0.09]  |
| Responsiveness × Disclosure         | 0.12***  | 0.03 | [0.05, 0.19]   |
| Age                                 | -0.16*** | 0.04 | [-0.23, -0.09] |
| Depressive Symptoms                 | -0.14*** | 0.04 | [-0.21, -0.06] |
| Family Conflict                     | -0.01    | 0.04 | [-0.07, 0.07]  |
| <b><u>Gender Model</u></b>          |          |      |                |
| Perceived Responsiveness            | 0.19***  | 0.05 | [0.10, 0.29]   |
| Gender                              | 0.02     | 0.07 | [-0.13, 0.17]  |
| Responsiveness × Gender             | 0.13     | 0.08 | [-0.03, 0.28]  |
| Age                                 | -0.17*** | 0.04 | [-0.24, -0.10] |
| Depressive Symptoms                 | -0.13*** | 0.04 | [-0.21, -0.06] |
| Family Conflict                     | -0.02    | 0.04 | [-0.09, 0.06]  |
| <b><u>Combined Model</u></b>        |          |      |                |
| Perceived Responsiveness            | 0.29***  | 0.07 | [0.14, 0.41]   |
| Self-Disclosure                     | -0.01    | 0.05 | [-0.11, 0.09]  |
| Gender                              | 0.02     | 0.07 | [-0.12, 0.17]  |
| Responsiveness × Disclosure         | 0.12**   | 0.04 | [0.04, 0.19]   |
| Responsiveness × Gender             | 0.02     | 0.08 | [-0.15, 0.18]  |
| Age                                 | -0.16*** | 0.04 | [-0.23, -0.09] |
| Depressive Symptoms                 | -0.14*** | 0.04 | [-0.21, -0.06] |
| Family Conflict                     | -0.0001  | 0.04 | [-0.07, 0.07]  |

*Note.*  $N = 193$  youth. Coeff = coefficient;  $SE$  = standard error;  $CI$  = confidence interval. Continuous scores were calculated such that higher scores indicate greater standing on the variable (e.g., greater perceived responsiveness). Continuous predictors and covariates were standardized. Gender was dummy-coded (0 = male, 1 = female).

\* $p < .05$ , \*\* $p < .01$ , \*\*\* $p < .001$

Table S4

*Associations of the Interaction of Perceived Responsiveness and Self-Disclosure and the Interaction of Perceived Responsiveness and Gender with Negative Affect*

| Variable                            | <b>Negative Affect</b> |      |                |
|-------------------------------------|------------------------|------|----------------|
|                                     | Coeff                  | SE   | 95% CI         |
| <b><u>Self-Disclosure Model</u></b> |                        |      |                |
| Perceived Responsiveness            | -0.05                  | 0.03 | [-0.10, 0.01]  |
| Self-Disclosure                     | 0.06*                  | 0.03 | [0.01, 0.11]   |
| Responsiveness × Disclosure         | -0.05*                 | 0.02 | [-0.08, -0.01] |
| Depressive Symptoms                 | 0.12***                | 0.02 | [0.08, 0.16]   |
| Family Conflict                     | 0.06**                 | 0.02 | [0.02, 0.09]   |
| <b><u>Gender Model</u></b>          |                        |      |                |
| Perceived Responsiveness            | 0.01                   | 0.02 | [-0.03, 0.06]  |
| Gender                              | -0.03                  | 0.04 | [-0.10, 0.05]  |
| Responsiveness × Gender             | 0.03                   | 0.04 | [-0.05, 0.11]  |
| Depressive Symptoms                 | 0.14***                | 0.02 | [0.10, 0.18]   |
| Family Conflict                     | 0.06**                 | 0.02 | [0.02, 0.10]   |
| <b><u>Combined Model</u></b>        |                        |      |                |
| Perceived Responsiveness            | -0.08*                 | 0.04 | [-0.15, -0.01] |
| Self-Disclosure                     | 0.07*                  | 0.03 | [0.02, 0.12]   |
| Gender                              | -0.04                  | 0.04 | [-0.12, 0.03]  |
| Responsiveness × Disclosure         | -0.06**                | 0.02 | [-0.09, -0.02] |
| Responsiveness × Gender             | 0.08                   | 0.04 | [-0.01, 0.16]  |
| Depressive Symptoms                 | 0.13***                | 0.02 | [0.09, 0.17]   |
| Family Conflict                     | 0.05**                 | 0.02 | [0.01, 0.09]   |

*Note.*  $N = 193$  youth. Coeff = coefficient;  $SE$  = standard error;  $CI$  = confidence interval. Continuous scores were calculated such that higher scores indicate greater standing on the variable (e.g., greater perceived responsiveness). Continuous predictors and covariates were standardized. Gender was dummy-coded (0 = male, 1 = female).

\* $p < .05$ , \*\* $p < .01$ , \*\*\* $p < .001$

-----

Insert Figure S1 Here

-----

*Figure S1.*  $N = 193$  youth. Interaction between perceived responsiveness and self-disclosure on youths' expression of the glucocorticoid receptor gene *NR3C1* (Panel A). Interaction between perceived responsiveness and gender on youths' expression of the glucocorticoid receptor gene *NR3C1* (Panel B). Lower and higher perceived responsiveness represent  $\pm 1$  *SD*. Shaded areas represent 95% confidence intervals for the simple slopes.



-----  
Insert Figure S2 Here  
-----

*Figure S2.*  $N = 193$  youth. Interaction between perceived responsiveness and self-disclosure on youths' positive affect (Panel A). Interaction between perceived responsiveness and self-disclosure on youths' negative affect (Panel B). Lower and higher perceived responsiveness represent  $\pm 1$  *SD*. Shaded areas represent 95% confidence intervals for the simple slopes.
